# Supplementary material for: Identification of mouse CD4+ T cell epitopes in SARS-CoV-2 BA.1 spike and nucleocapsid for use in peptide:MHCII tetramers
Source: PubMed Central journal article supplement — bioRxiv. 2023 Nov 17:2023.11.16.566918. Preprint. [Version 1] doi: 10.1101/2023.11.16.566918 (PMC10680761; doi:10.1101/2023.11.16.566918), 2023-11-17
Supplement: media-1.pdf [file media-1.pdf]

# Figure S1

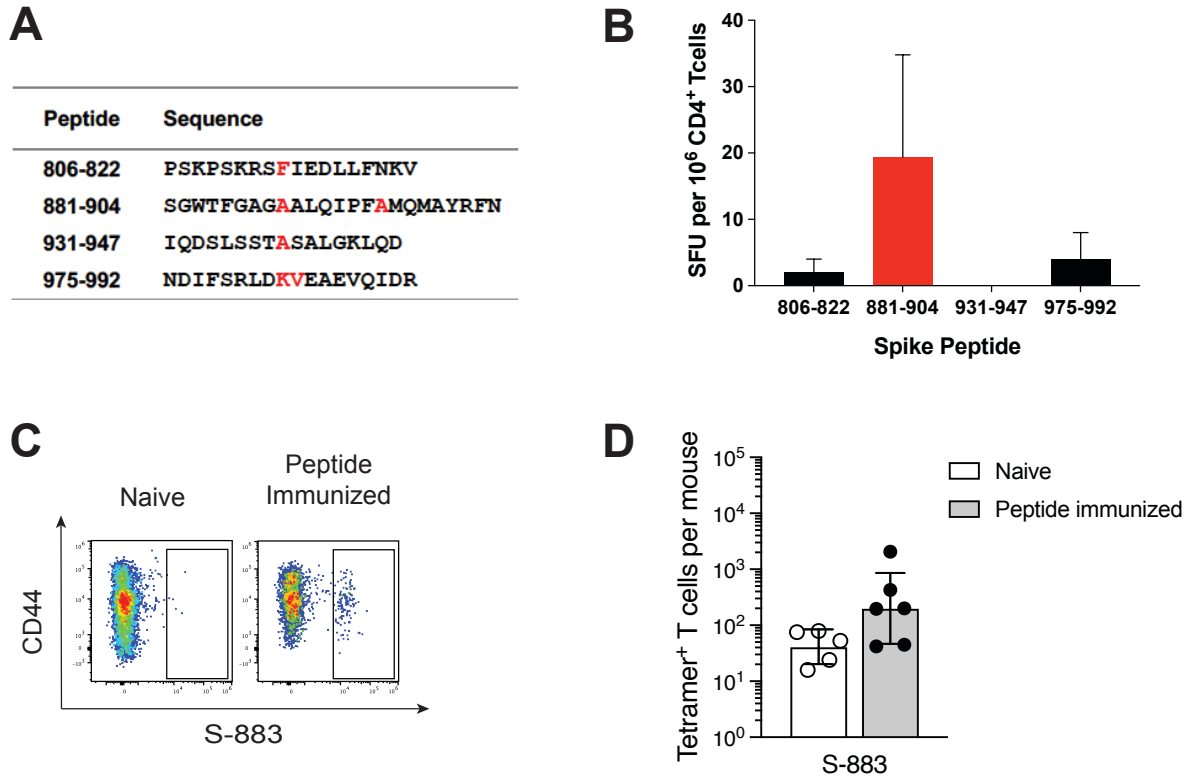

## Figure S1. Identification of lost epitopes in Hexapro spike

**A)** Peptides were generated covering the regions of spike that were affected by proline substitutions in the Hexapro construct. Native residues that were replaced by prolines are indicated in red. **B)** C57BL/6 mice were immunized s.c. with a mix of the 4 peptides plus CFA as adjuvant and 9-10 days later, CD4<sup>+</sup> T cells were tested for reactivity to each individual peptide by IFN $\gamma$  ELISpot assay. Mean values  $\pm$  SEM are shown for n=2-6 mice processed across multiple independent experiments. **C)** Representative flow cytometry plots of CD4<sup>+</sup> gated events illustrating S-883 tetramer staining of epitope-specific T cells from naïve and S-883 peptide-immunized mice. **D)** Quantification of S-883-specific CD4<sup>+</sup> T cells from naïve and peptide-immunized mice. Mean values  $\pm$  SEM are shown for n=5-6 mice per epitope across multiple independent experiments.

## Figure S2

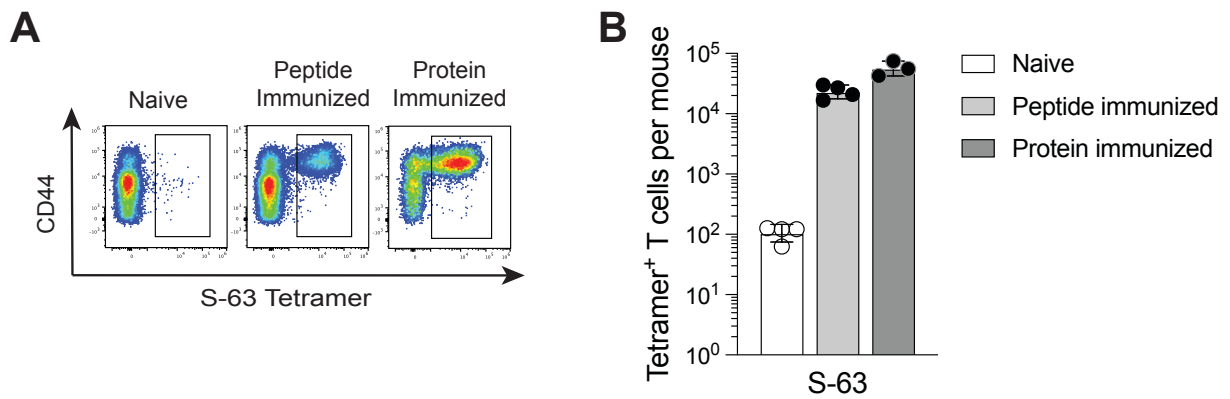

**Figure S2. Tetramer analysis of CD4<sup>+</sup> T cells specific for the S-63 epitope present in the ancestral strain of SARS-CoV-2, but not BA.1**

**A)** Representative flow cytometry plots of CD4<sup>+</sup> gated events illustrating S-63 tetramer staining of epitope-specific T cells from naïve, S-63 peptide-immunized, or Wuhan D614G spike protein-immunized mice. **B)** Quantification of S-63-specific CD4<sup>+</sup> T cells from naïve, peptide-immunized, and protein-immunized mice. Mean values  $\pm$  SEM are shown for n=3-4 mice per epitope across multiple independent experiments.
